# Supplementary material
Source: publisher site journal article supplement (https://www.degruyterbrill.com/publication/isbn/9781683922599/downloadAsset/9781683922599_AUTOCAD%202019%20Begining%20and%20Intermediate.zip)
Supplement: Supplementary file 1 [file AutoCADTrialLink.pdf › CompanionFiles/AutoCADTrialLink.pdf]

# **AutoCAD® Demo Link**

## **1)Visit:**

<http://www.autodesk.com/products/autocad/free-trial>

## **2)Click on "Yes" in "Are You a Student" box**

## **3) Join AutoDesk Education Community(see details online)**

Students Can Join the Autodesk Education Community  
Benefits include:

- +Use the tools that are helping shape the future of design
- +Get full versions of software
- +No 30-day trial limitation
- +Access training
- +Share your designs and view portfolios

## **4)Download demo version (32 bit or 64 bit) or MAC**
