# Supplementary material
Source: publisher site journal article supplement (https://www.degruyterbrill.com/publication/isbn/9781683922599/downloadAsset/9781683922599_AUTOCAD%202019%20Begining%20and%20Intermediate.zip)
Supplement: Supplementary file 1 [file Door Cost Schedule.xls]

## Sheet: Sheet1
	Door Type	Quantity	Cost	Total Cost
	Type 01	18	199.99	3599.82
	Type 02	11	129.99	1429.89
	Type 03	12	159.99	1919.88
	Total Cost			6949.59
