# Supplementary material
Source: publisher site journal article supplement (https://www.degruyterbrill.com/publication/isbn/9781683922599/downloadAsset/9781683922599_AUTOCAD%202019%20Begining%20and%20Intermediate.zip)
Supplement: Supplementary file 2 [file House General Notes.doc]

General Notes:

- Measurement in this design is not final, future adjustment is possible.
- Missing measurement is possible is some areas
- Typical floor plans will be available in one month from contract signing date
- Final design is expected in three months from contract signing
- Details will follow in a month time after final design is completed
